# Supplementary material for: Urban Green Spaces and Vector-Borne Disease Risk in Africa: Case of the Sibang Forested Park in Libreville (Gabon, Cen-Tral Africa)
Source: Preprints.org preprint supplement (doi:10.20944/preprints202302.0273.v1), 2023-02-16
Supplement: Supplementary file 1 [file supplementary]

**Figure S1:** The bi-dimensional representation of environmental and biotic variables associated with larval habitat distribution on the factorial plan of the two first MCA dimensions (38.4% of explained inertia). The wide segregation of variable on the factorial plan translates a good correlation of these variables with the species composition variability among larval habitats.


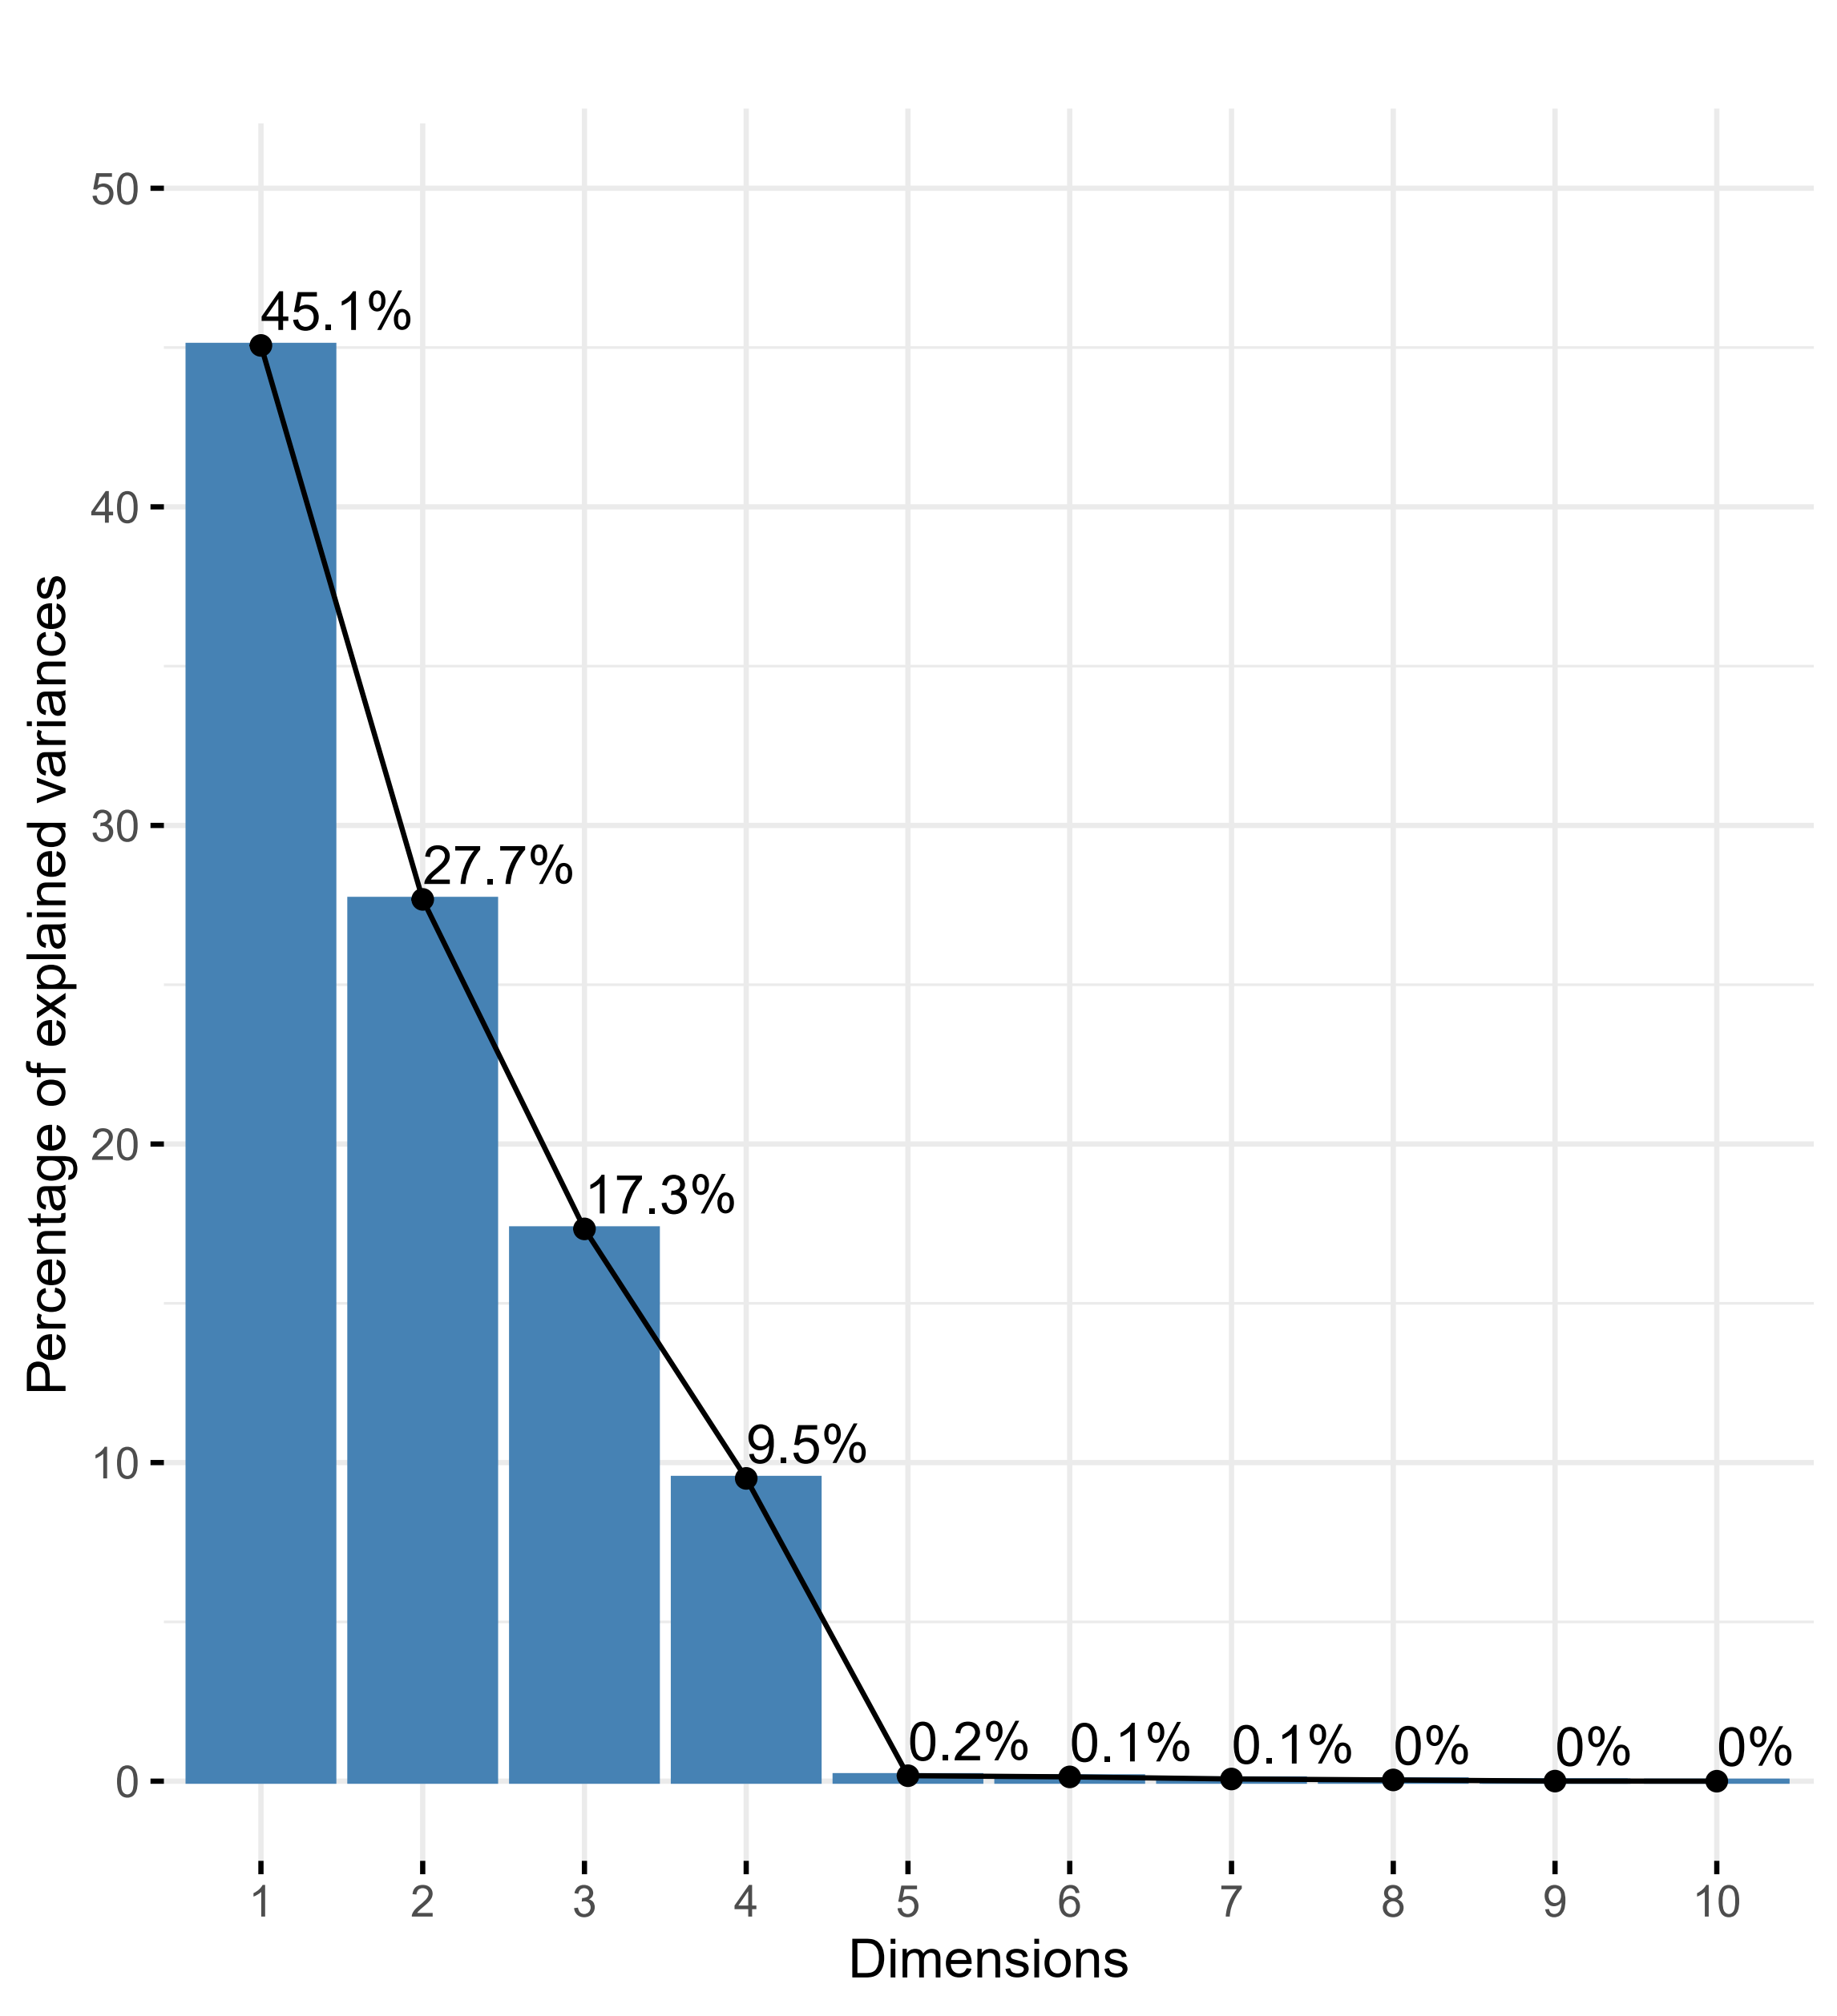


**Figure S2:** PAC’s percentage of explained variances of data following the dimensions. The first two dimensions (1 & 2) refer to an explained variance of 72.8%.
